# Supplementary material for: Single-cell RNA sequencing reveals myeloid and T cell co-stimulation mediated by IL-7 anti-cancer immunotherapy
Source: Springer Nature journal article supplement (doi:10.1038/s41416-024-02617-7), 2024-02-29
Supplement: MOESM1 [file 41416_2024_2617_MOESM1_ESM.pdf]

# Supplementary Figure 1

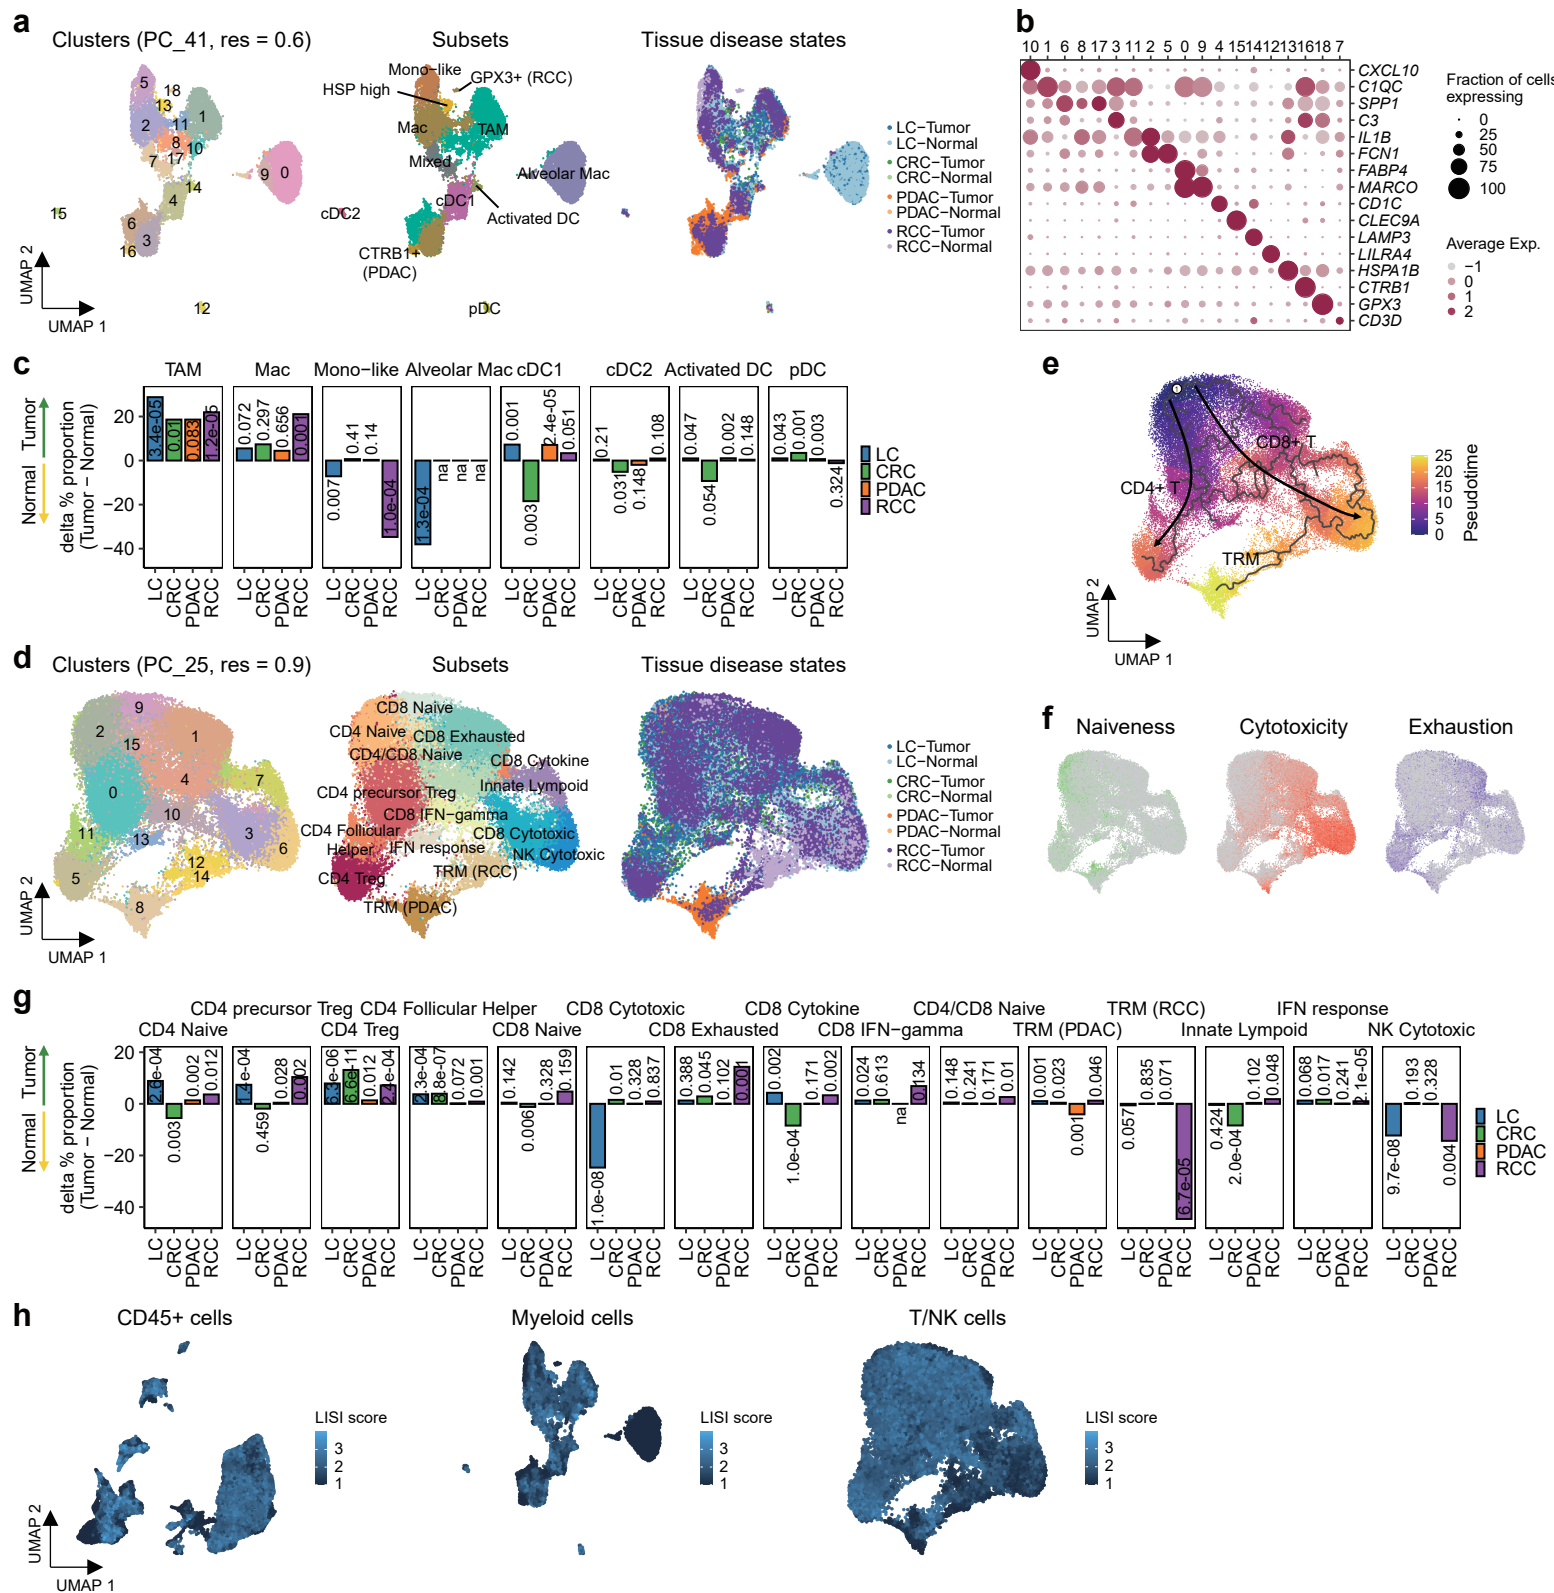

**Supplementary Fig 1. Sub-clustering of myeloid and T/NK cell populations from human scRNA-seq data.** **a**, UMAP plot of 18,372 myeloid cells from four human tumors, colored by clusters, cell subsets, and tissue disease states as indicated. **b**, Dot plot of expression of selected markers for each myeloid cell cluster. Color depicts mean expression value scaled by z-transformation and limited to a scale from -2.5 to 2.5. Dot size depicts the fraction of cells with the gene expression value for each cluster. **c**, Changes in myeloid cell subset proportions between tumors and normal tissues. The text in the plot represents the two-sided T-test p-value. **d**, UMAP plot of 52,034 T/NK cells from four human tumors, colored by clusters, cell subsets, and tissue disease states as indicated. **e** and **f**, UMAP plot of T/NK cells colored by pseudotime estimated by Monocle 3 (**e**) and T cell functionality scores (**f**). **g**, Changes in T/NK cell subset proportions between tumors and normal tissues. The text in the plot represents the two-sided T-test p-value. **h**, UMAP plot of CD45+, myeloid, and T/NK cells from four human tumors, colored by LISI score.

Supplementary Figure 2

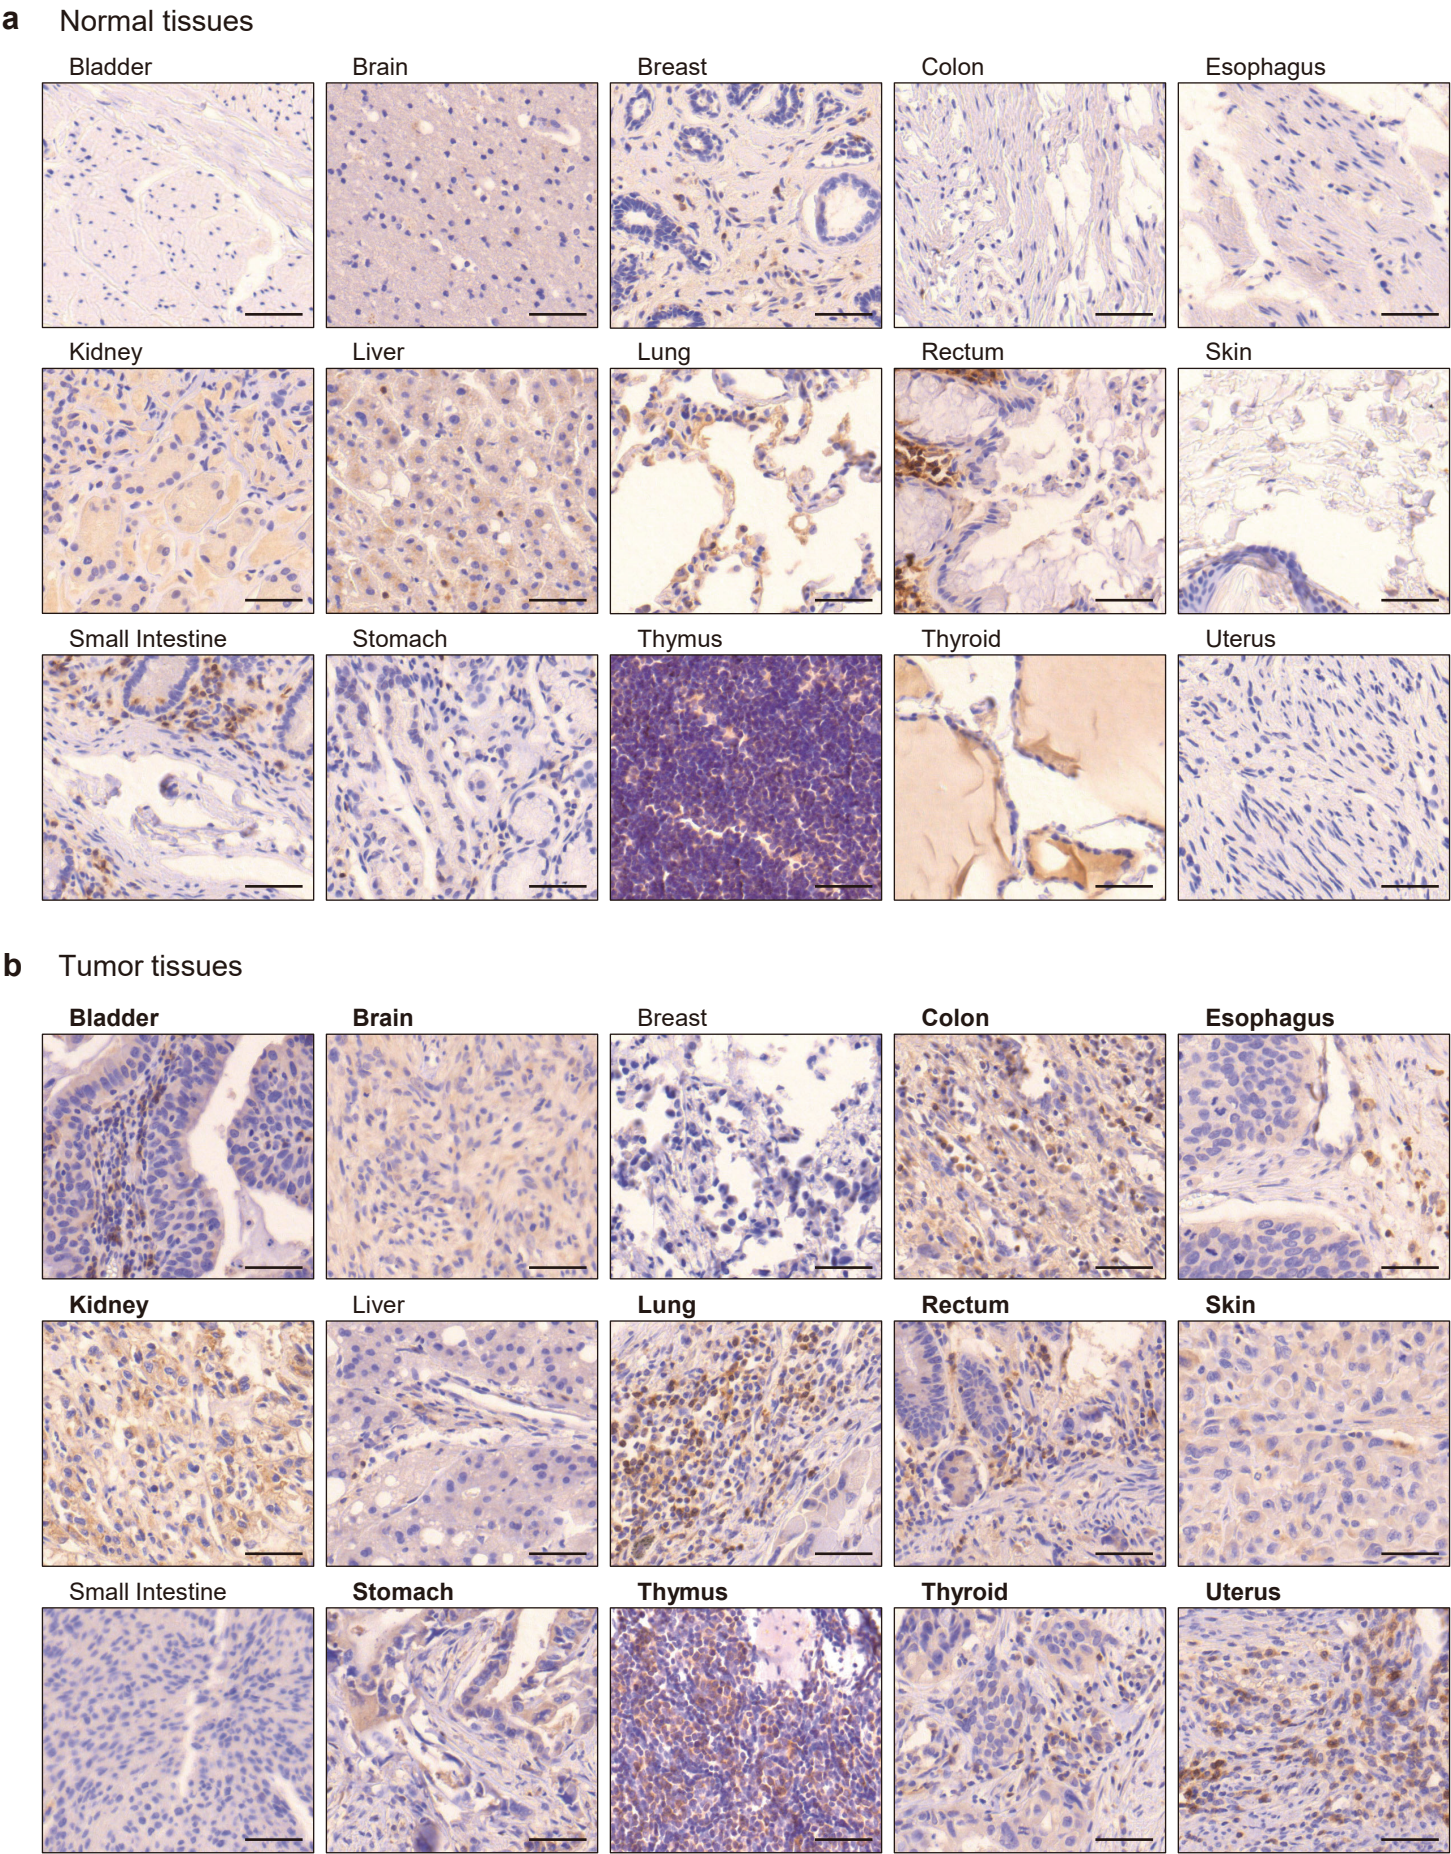

**Supplementary Fig 2. IL7R expression in 15 human cancer types using immunohistochemistry array.** Immunohistochemistry staining of IL7R in normal (a) and tumor (b) tissues of 15 cancer types. Scale bar, 50  $\mu$ m.

Supplementary Figure 3

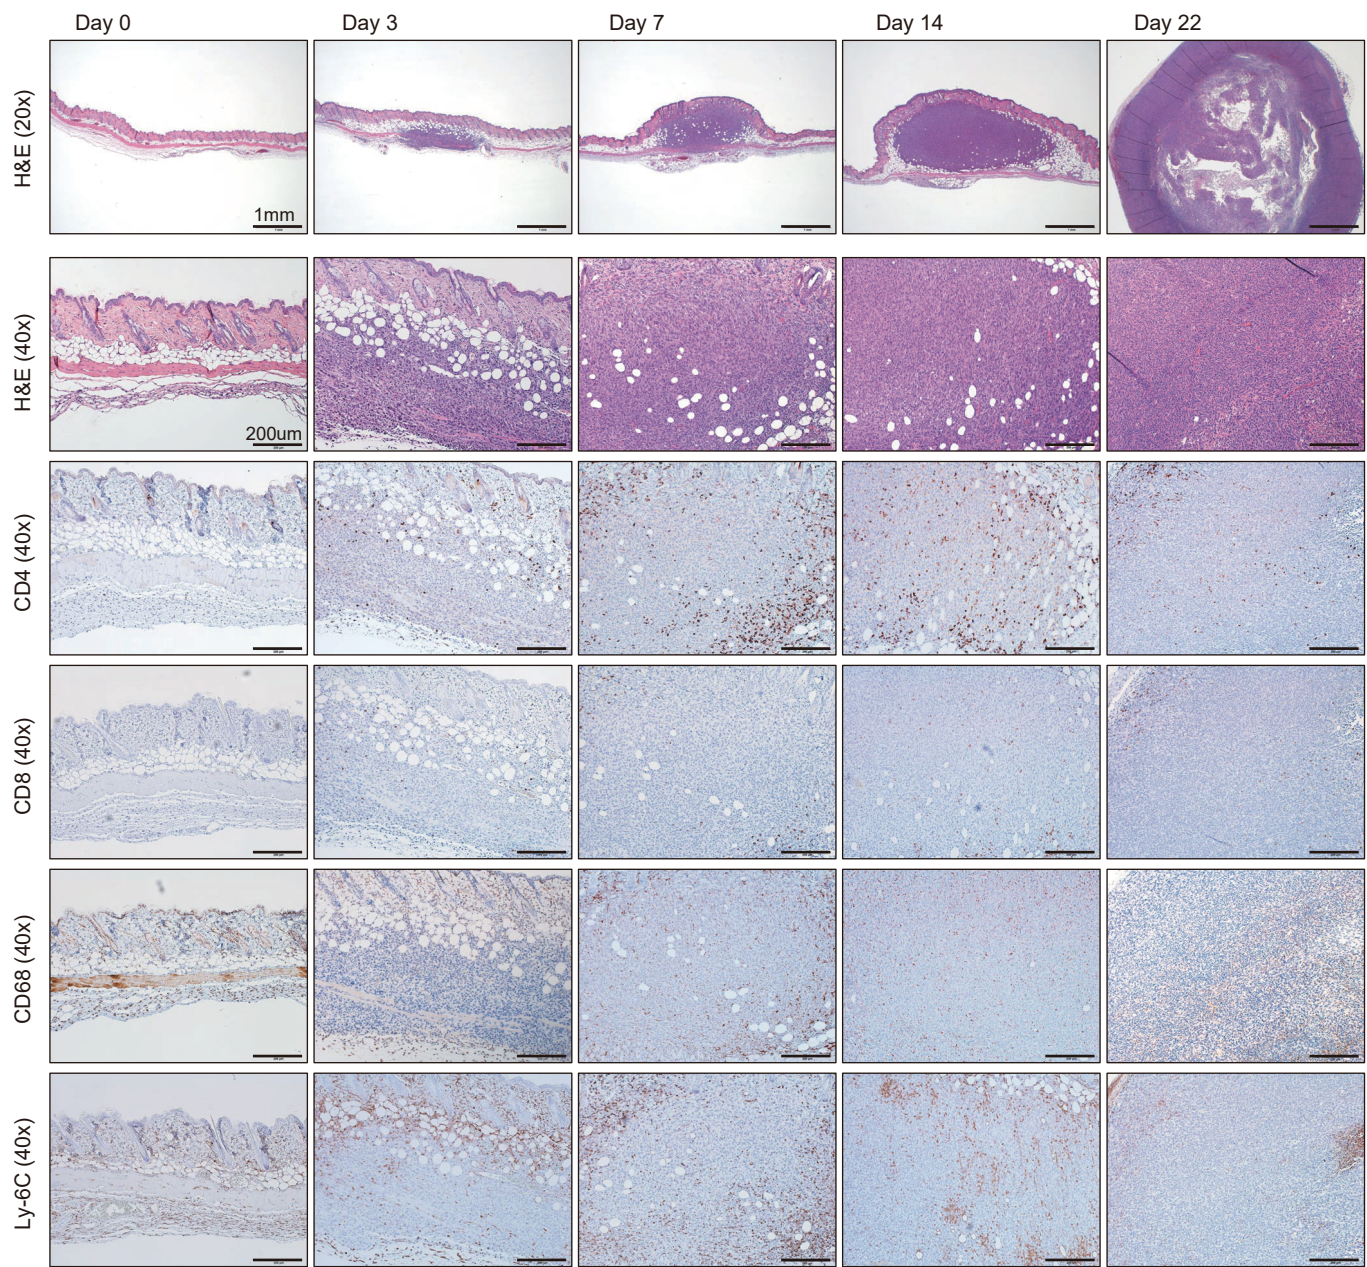

**Supplementary Fig 3. Immunohistochemistry for immune cell invasion in a syngeneic mouse model.** Histochemistry images of immune cell invasion in the CT26 syngeneic tumor model. Tumor tissues adjacent to skin were stained with hematoxylin & eosin (H&E) and immune cell marker panel (CD4 for CD4+ T, CD8 for CD8+ T, CD68 for macrophage, and Ly6C for monocyte). Scale bars of 20x images are 1mm (upper) and that of 40x images are 200 µm (lower).

# Supplementary Figure 4

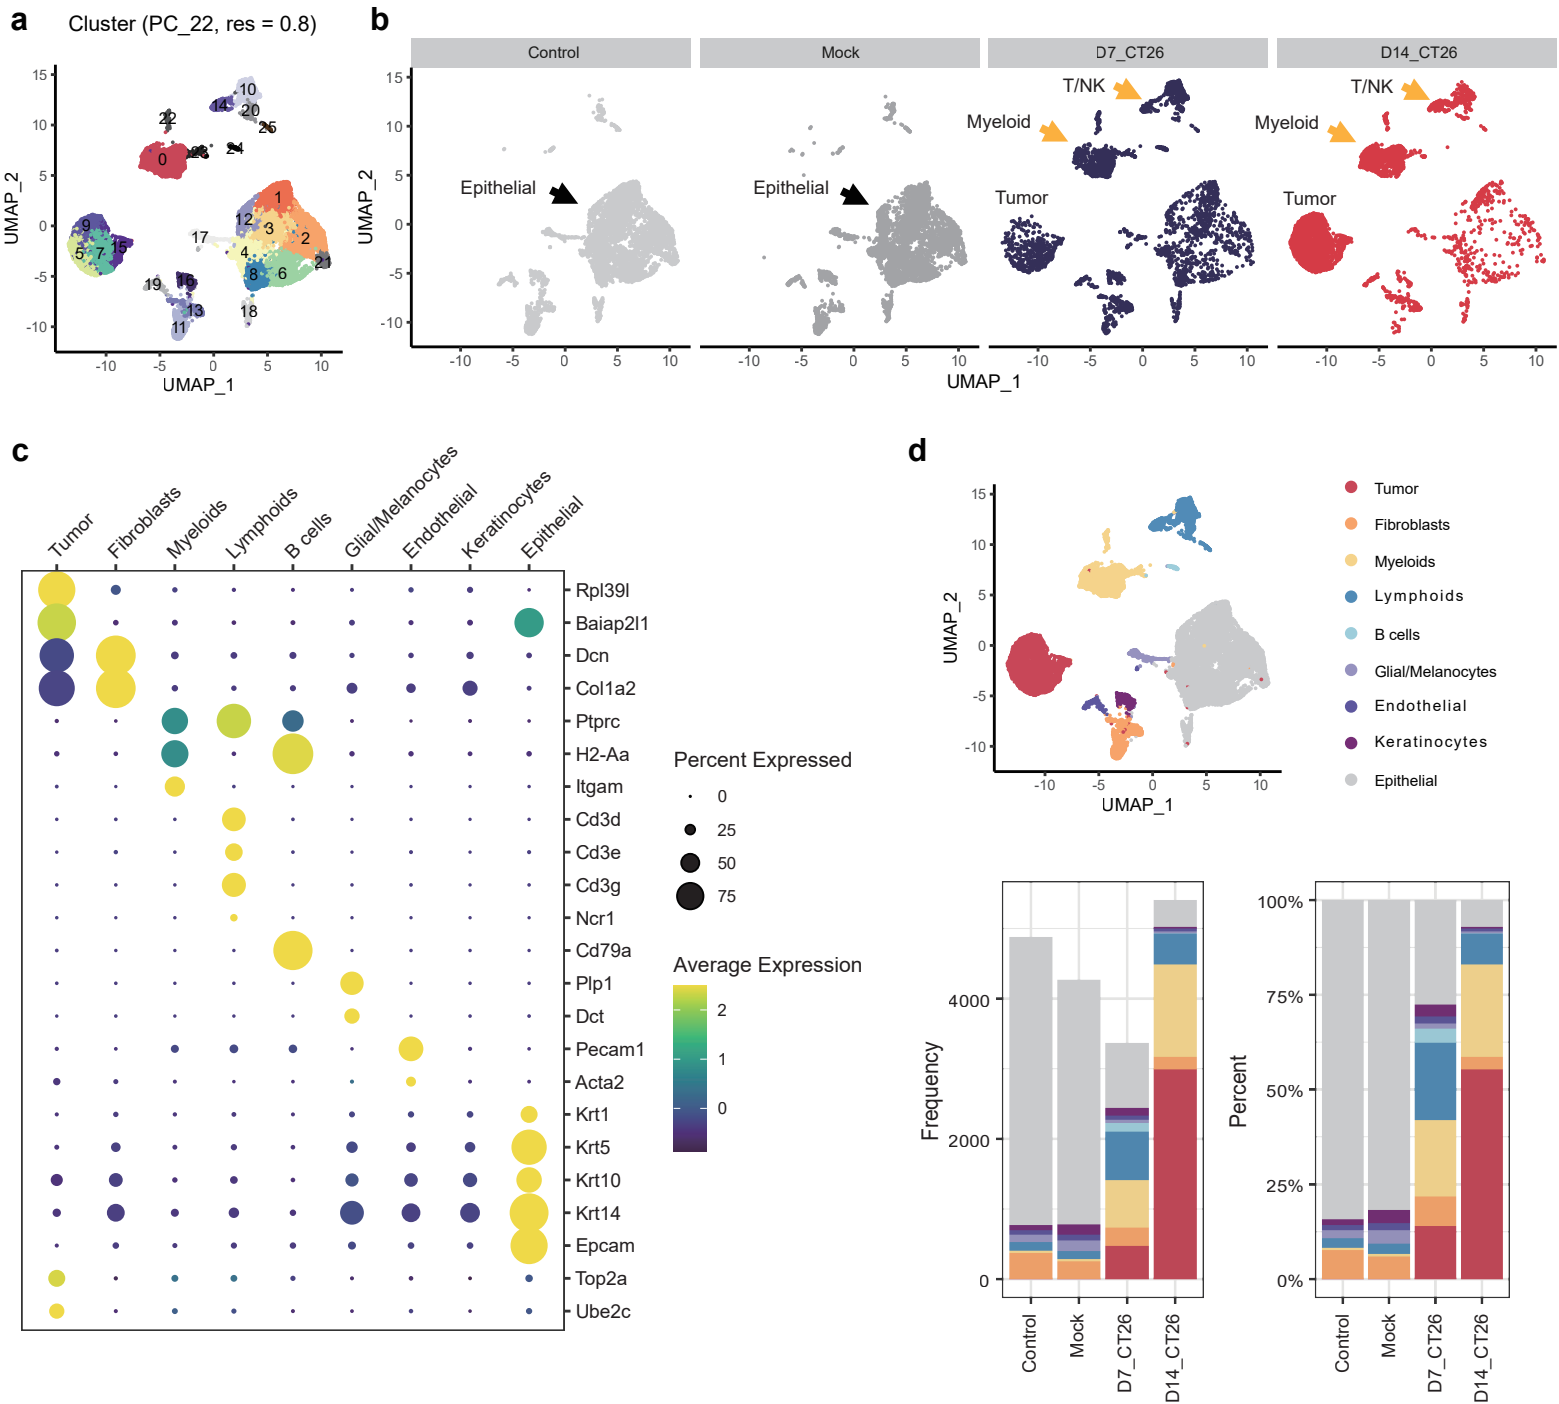

**Supplementary Fig 4. scRNAseq data of mouse tumor model during tumor growth. a,** UMAP plot of 19,280 cells from control at day 0 (Control), mock-injection control at day 7 (Mock), CT26 tumor-transplant at day 7 (D7), and CT26 tumor-transplant at day 14 (D14). Each dot represents a cell and colored by cluster. **b,** UMAP plots separated by sample. Cell types enriched in the sample were annotated by arrows. **c,** Dot plot of expression of known cell lineage markers for each cell type. Color depicts mean expression value and size depicts the fraction of cells with the gene expression. **d,** UMAP plot (upper) and frequency or percentage bar plots (lower). Color depicts a cell type.

Supplementary Figure 5

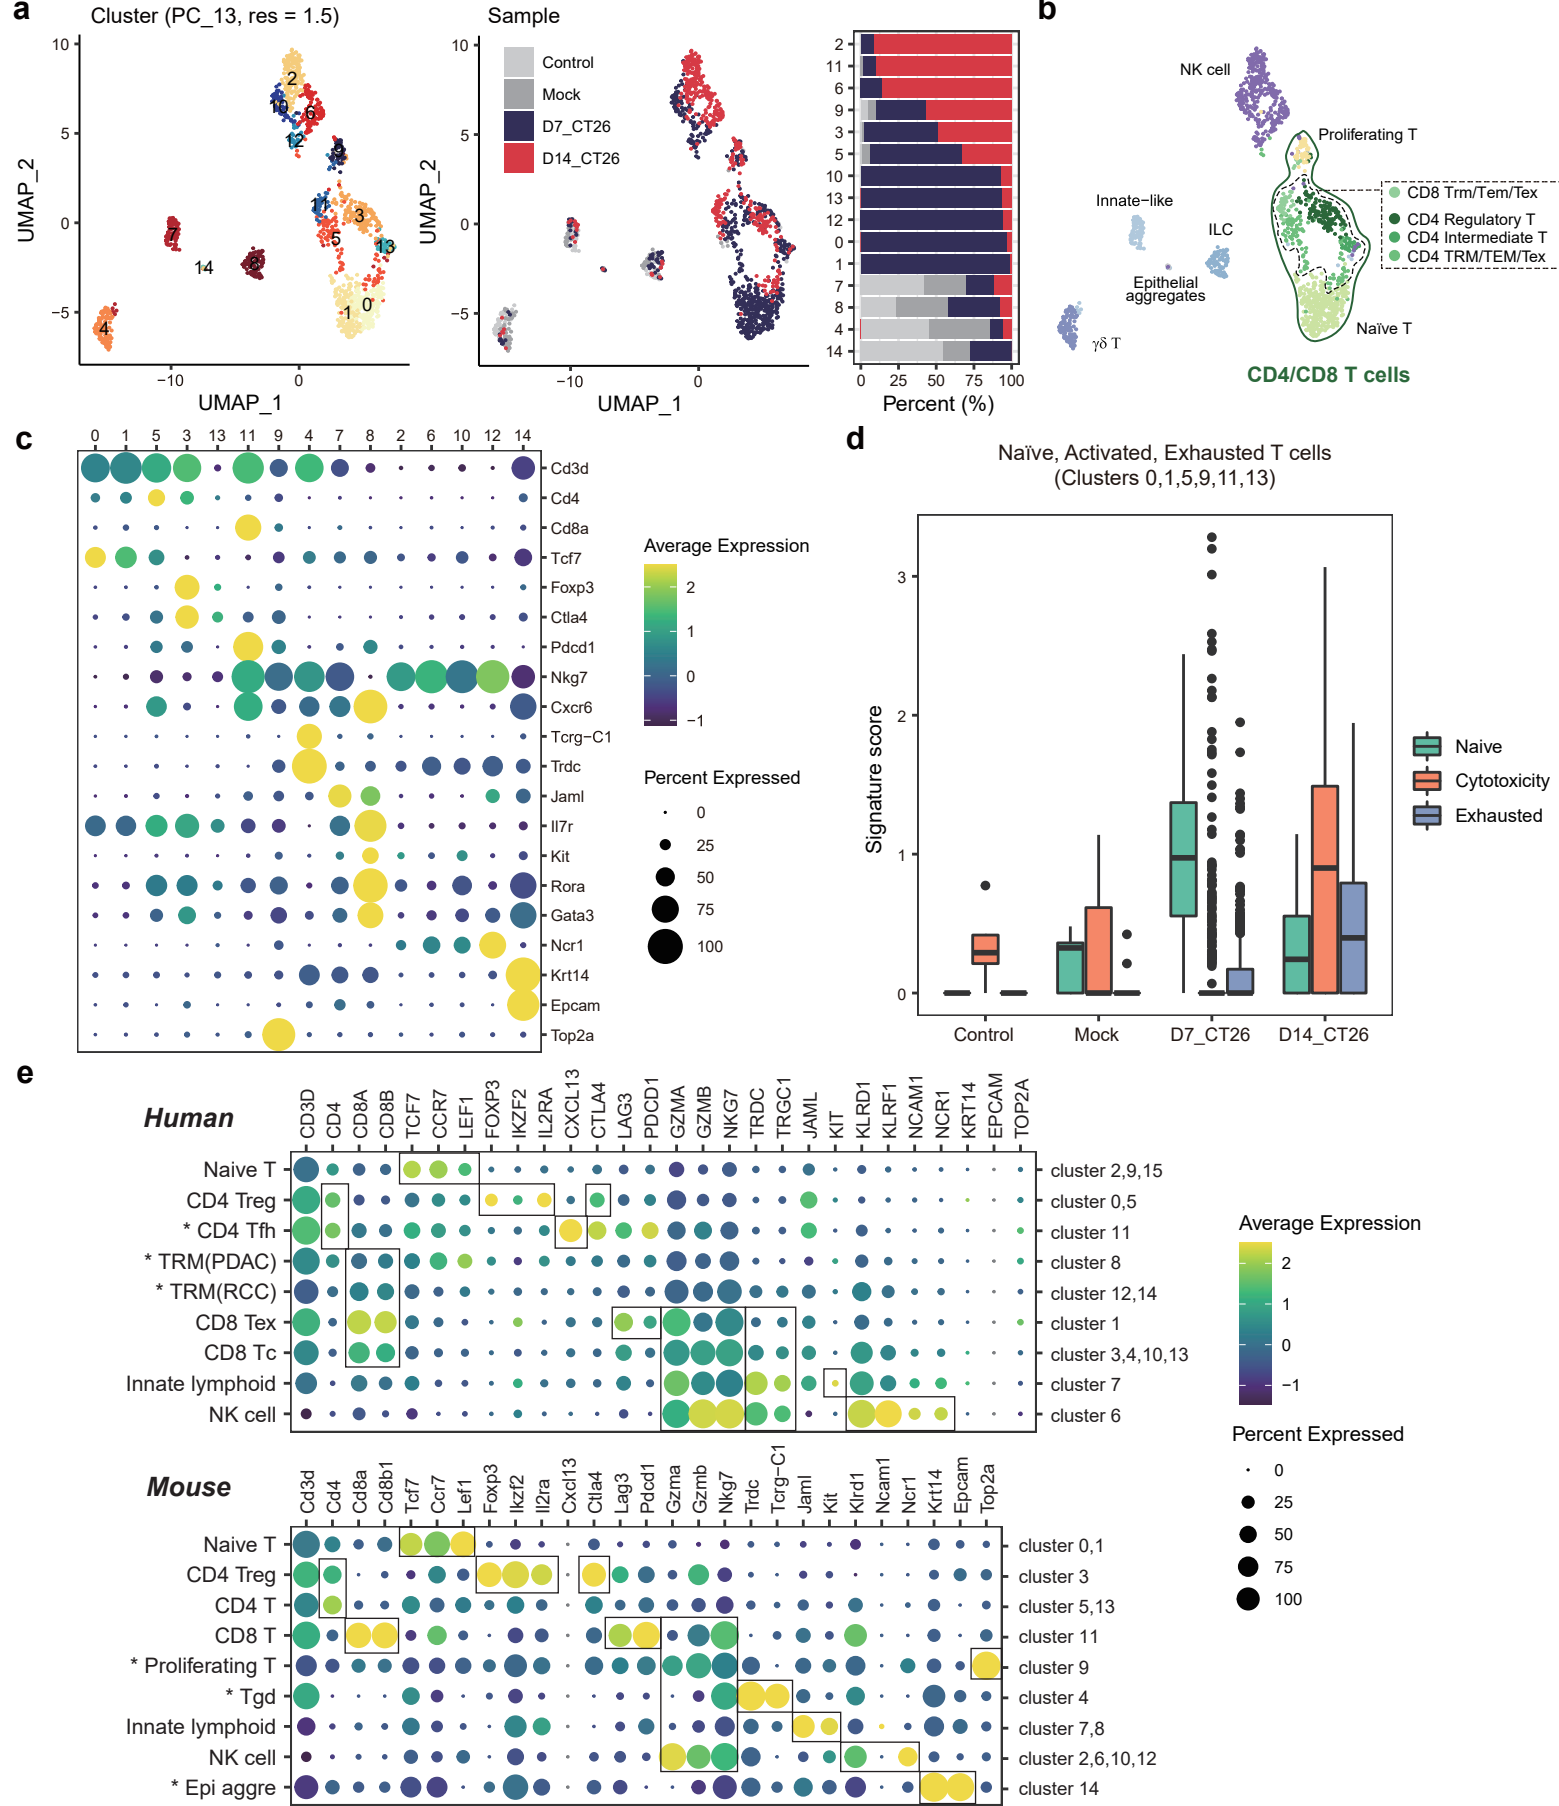

**Supplementary Fig 5. Analysis of lymphoid subset using scRNA-seq during tumor growth. a,** UMAP plots of lymphoid cells (left) and corresponding bar plot of sample proportions in each cluster (right). UMAP plots were colored by cluster or sample as indicated. **b,** UMAP plot colored with subsets of lymphoid cells. **c,** Dot plot of expression of known cell subset markers in each cluster. Color depicts mean expression value and size depicts the fraction of cells with the gene expression. **d,** Boxplot of T cell functionality scores in each sample. **e,** Dot plots of human and mouse data for known marker genes of each lymphoid subset. Box indicates subset-specific marker expression and asterisk (\*) indicates a subcluster detected in only one species.

# Supplementary Figure 6

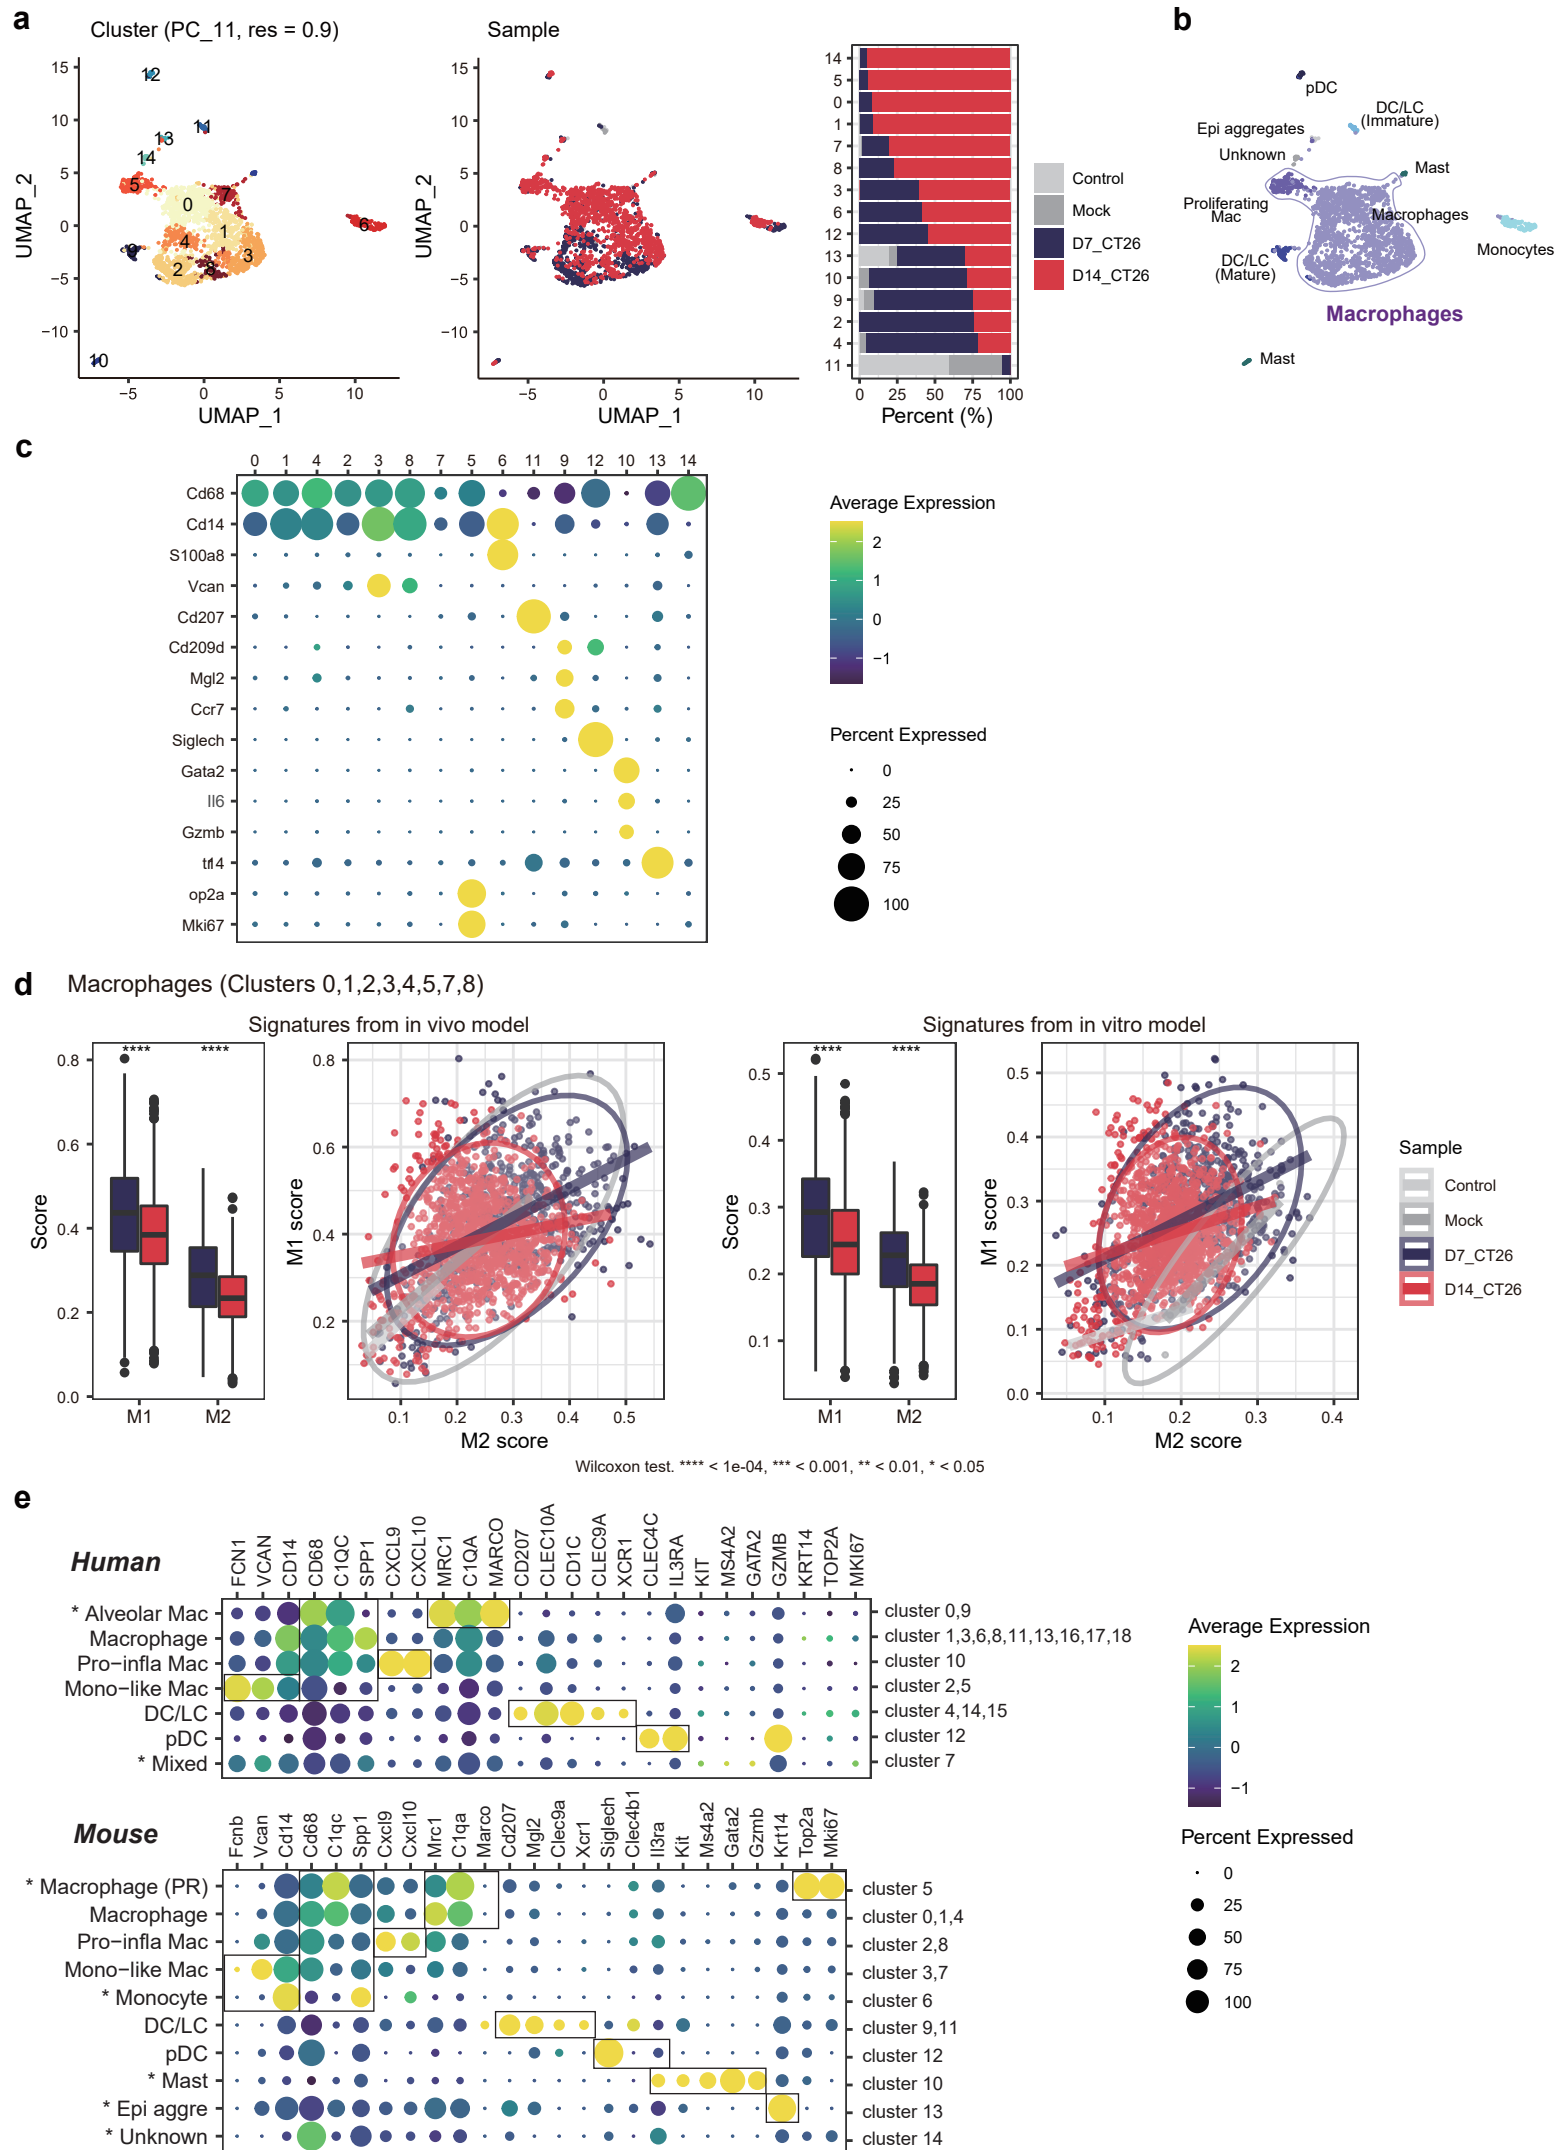

**Supplementary Fig 6. Analysis of myeloid subset using scRNA-seq during tumor growth. a,** UMAP plots of myeloid cells (left) and corresponding bar plot of sample proportions in each cluster (right). UMAP plots were colored by cluster or sample as indicated. **b,** UMAP plot colored with subsets of myeloid cells. **c,** Dot plot of expression of known cell subset markers in each cluster. Color depicts mean expression value and size depicts the fraction of cells with the gene expression. **d,** Comparison of M1 and M2 signatures between time points (D7 and D14). The M1/M2 signatures obtained from *in vivo* model (left) or *in vitro* model (right) were used. In boxplot, significance of differences in scores was tested with the Wilcoxon test. A linear regression model was applied to represent the macrophage characteristic axis of each sample. **e,** Dot plots of human and mouse data for known marker genes of each myeloid subset. Box indicates subset-specific marker expression and asterisk (\*) indicates a subcluster detected in only one species.

## Supplementary Figure 7

### a Lymphoids

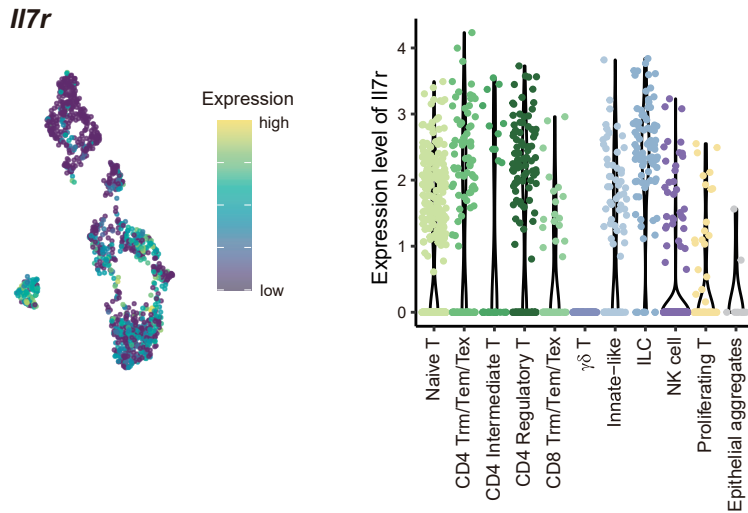

### b

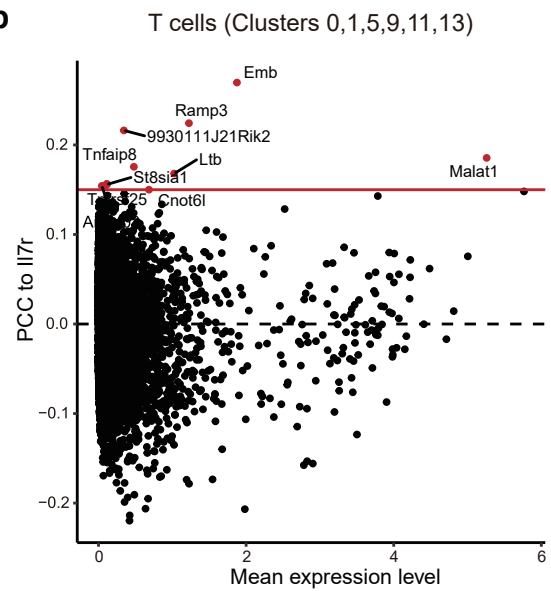

### c Myeloids

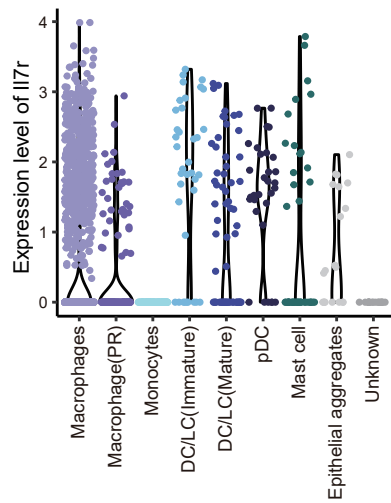

### d Macrophages (Clusters 0, 1, 2, 3, 4, 5, 7, 8)

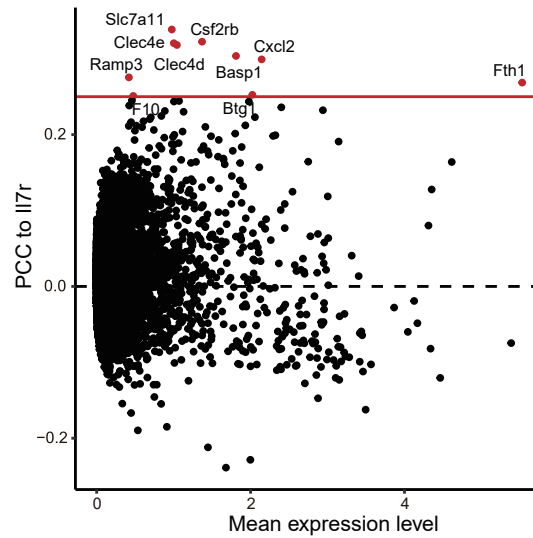

### Mature DC (Cluster 9)

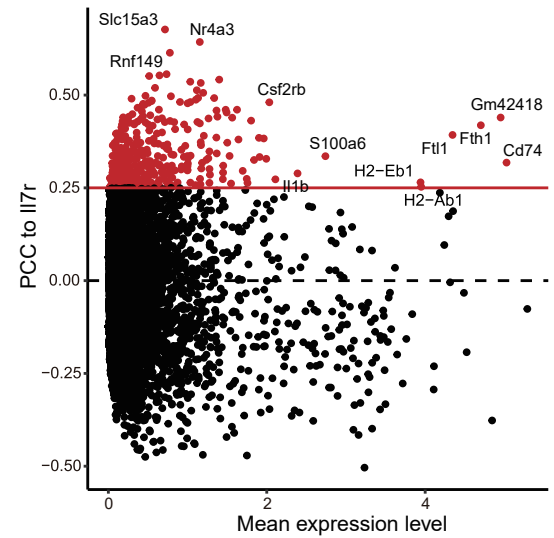

**Supplementary Fig 7. Expression of *Il7r* gene in scRNAseq data of mouse model.** **a**, Expression of *Il7r* in lymphoid cells. UMAP plot was colored by gene expression level (left). Violin plot shows gene expression level in each subset (right). **b**, Correlation analysis between the expression of *Il7r* and that of other genes in T cells. The x-axis and y-axis indicate the average expression of the gene and Pearson's correlation coefficient (PCC) to *Il7r* expression, respectively. **c**, Expression of *Il7r* in myeloid cells. Violin plot shows gene expression level in each subset. **d**, Correlation analysis between the expression of *Il7r* and that of other genes in macrophages (left) and mature dendritic cells (right). The x-axis and y-axis indicate the average expression of the gene and Pearson's correlation coefficient (PCC) to *Il7r* expression, respectively.

# Supplementary Figure 8

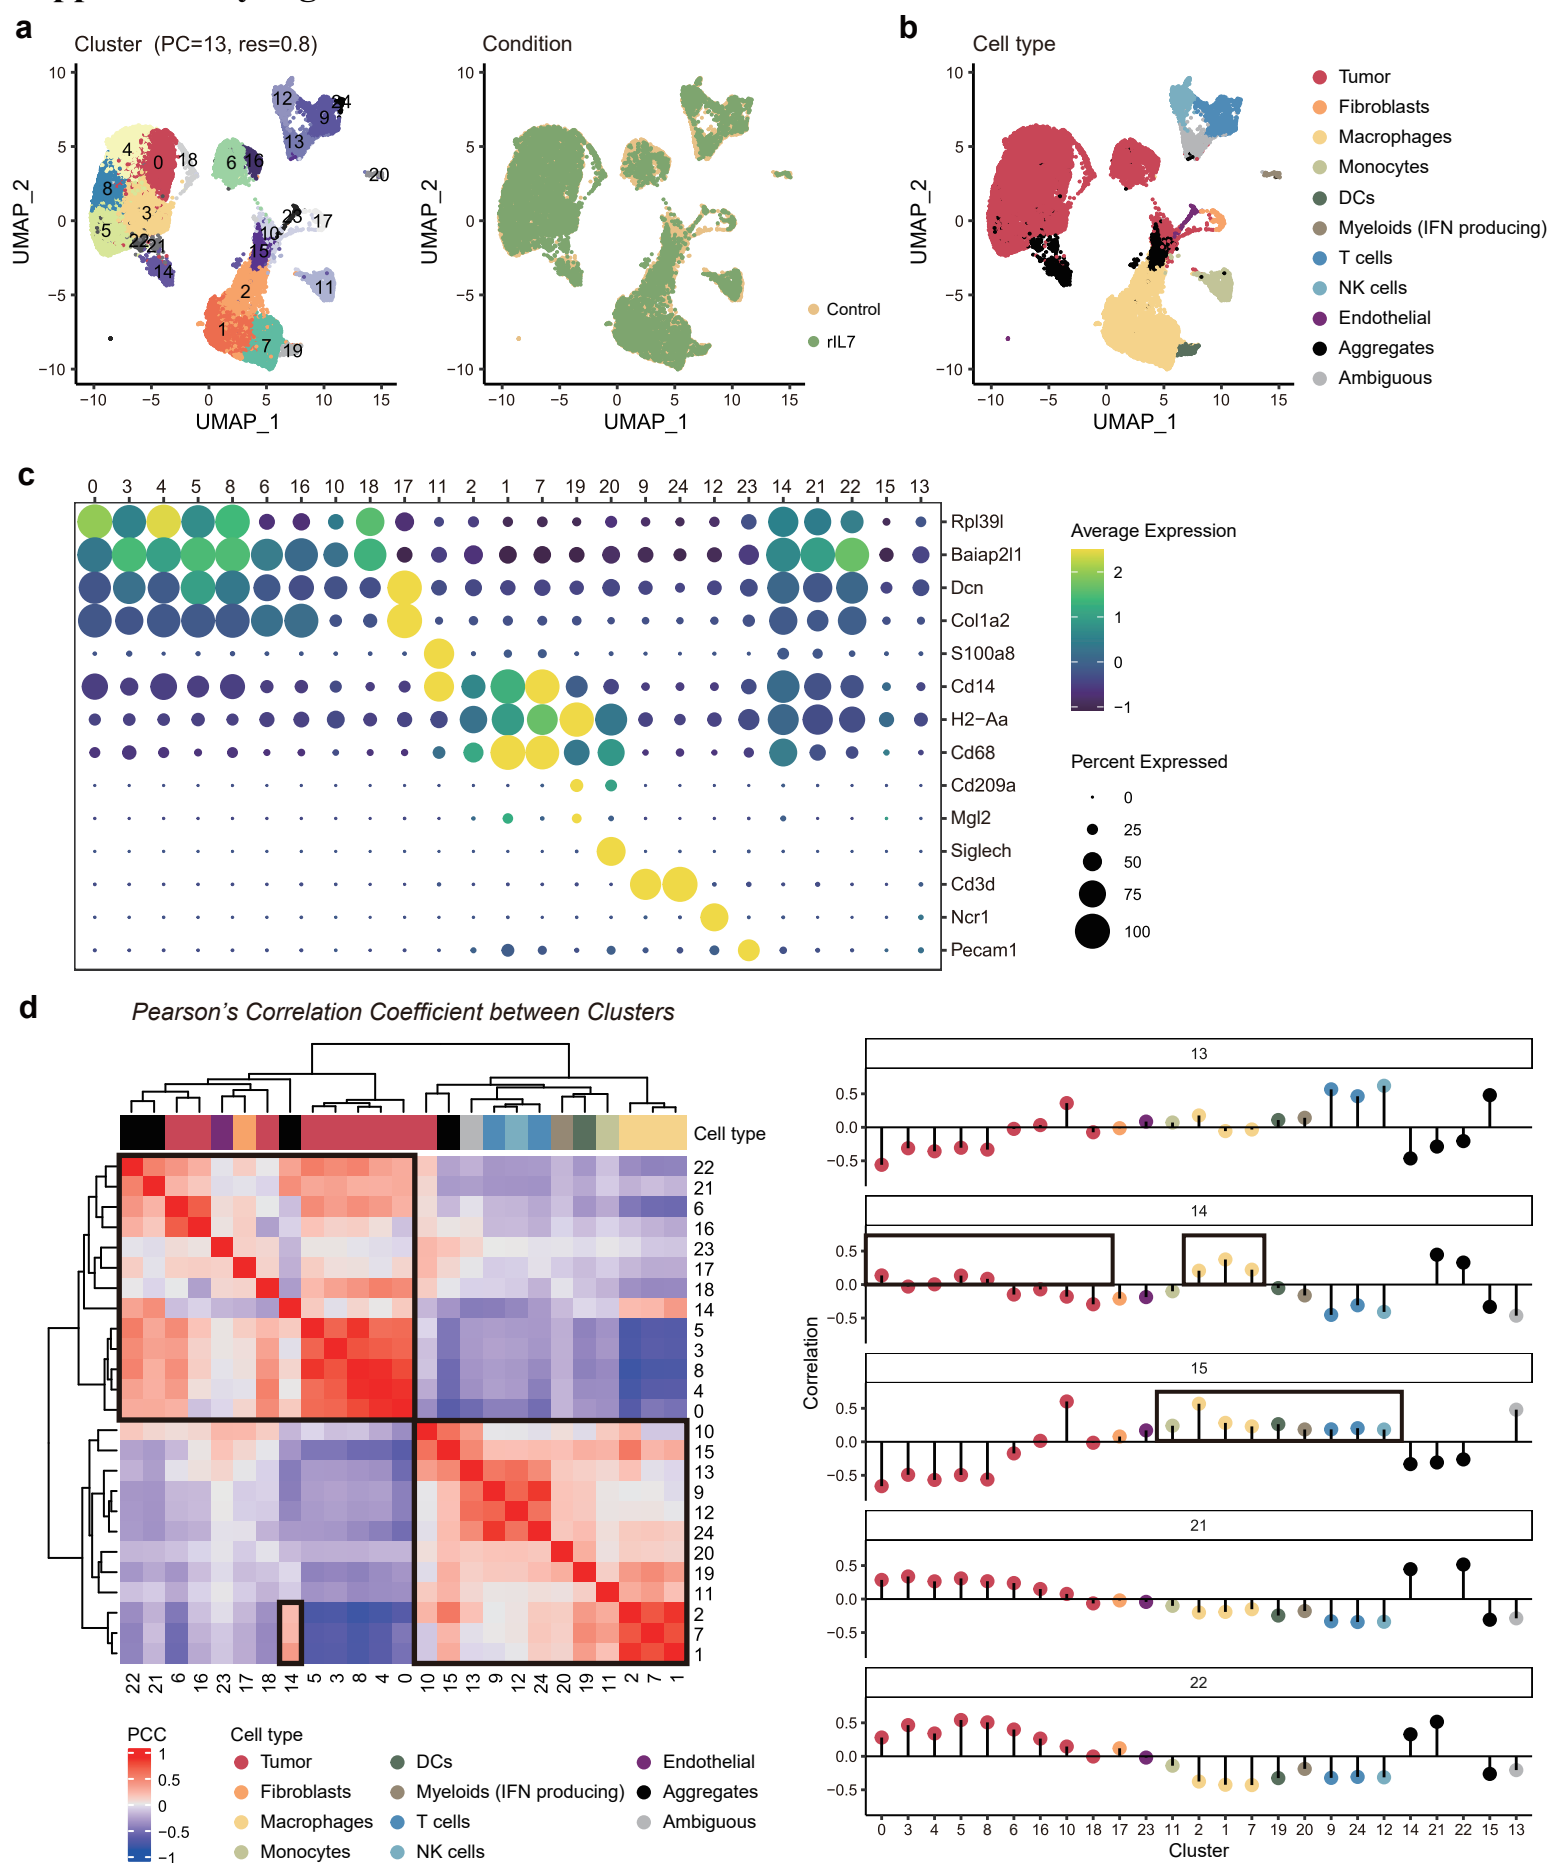

**Supplementary Fig 8. scRNAseq of mouse tumor model with rIL7 treatment.** **a**, UMAP plots of 22,756 cells, colored by cluster or treatment condition (sample) as indicated. **b**, UMAP plot color annotated by cell types. **c**, Dot plot of expression of known cell subset markers in each cluster. Color depicts mean expression value and size depicts the fraction of cells with the gene expression. **d**, Correlation plots between clusters illustrate similar cell types with aggregates (cluster 14, 15, 21, and 22) or ambiguous cluster (cluster 13).

# Supplementary Figure 9

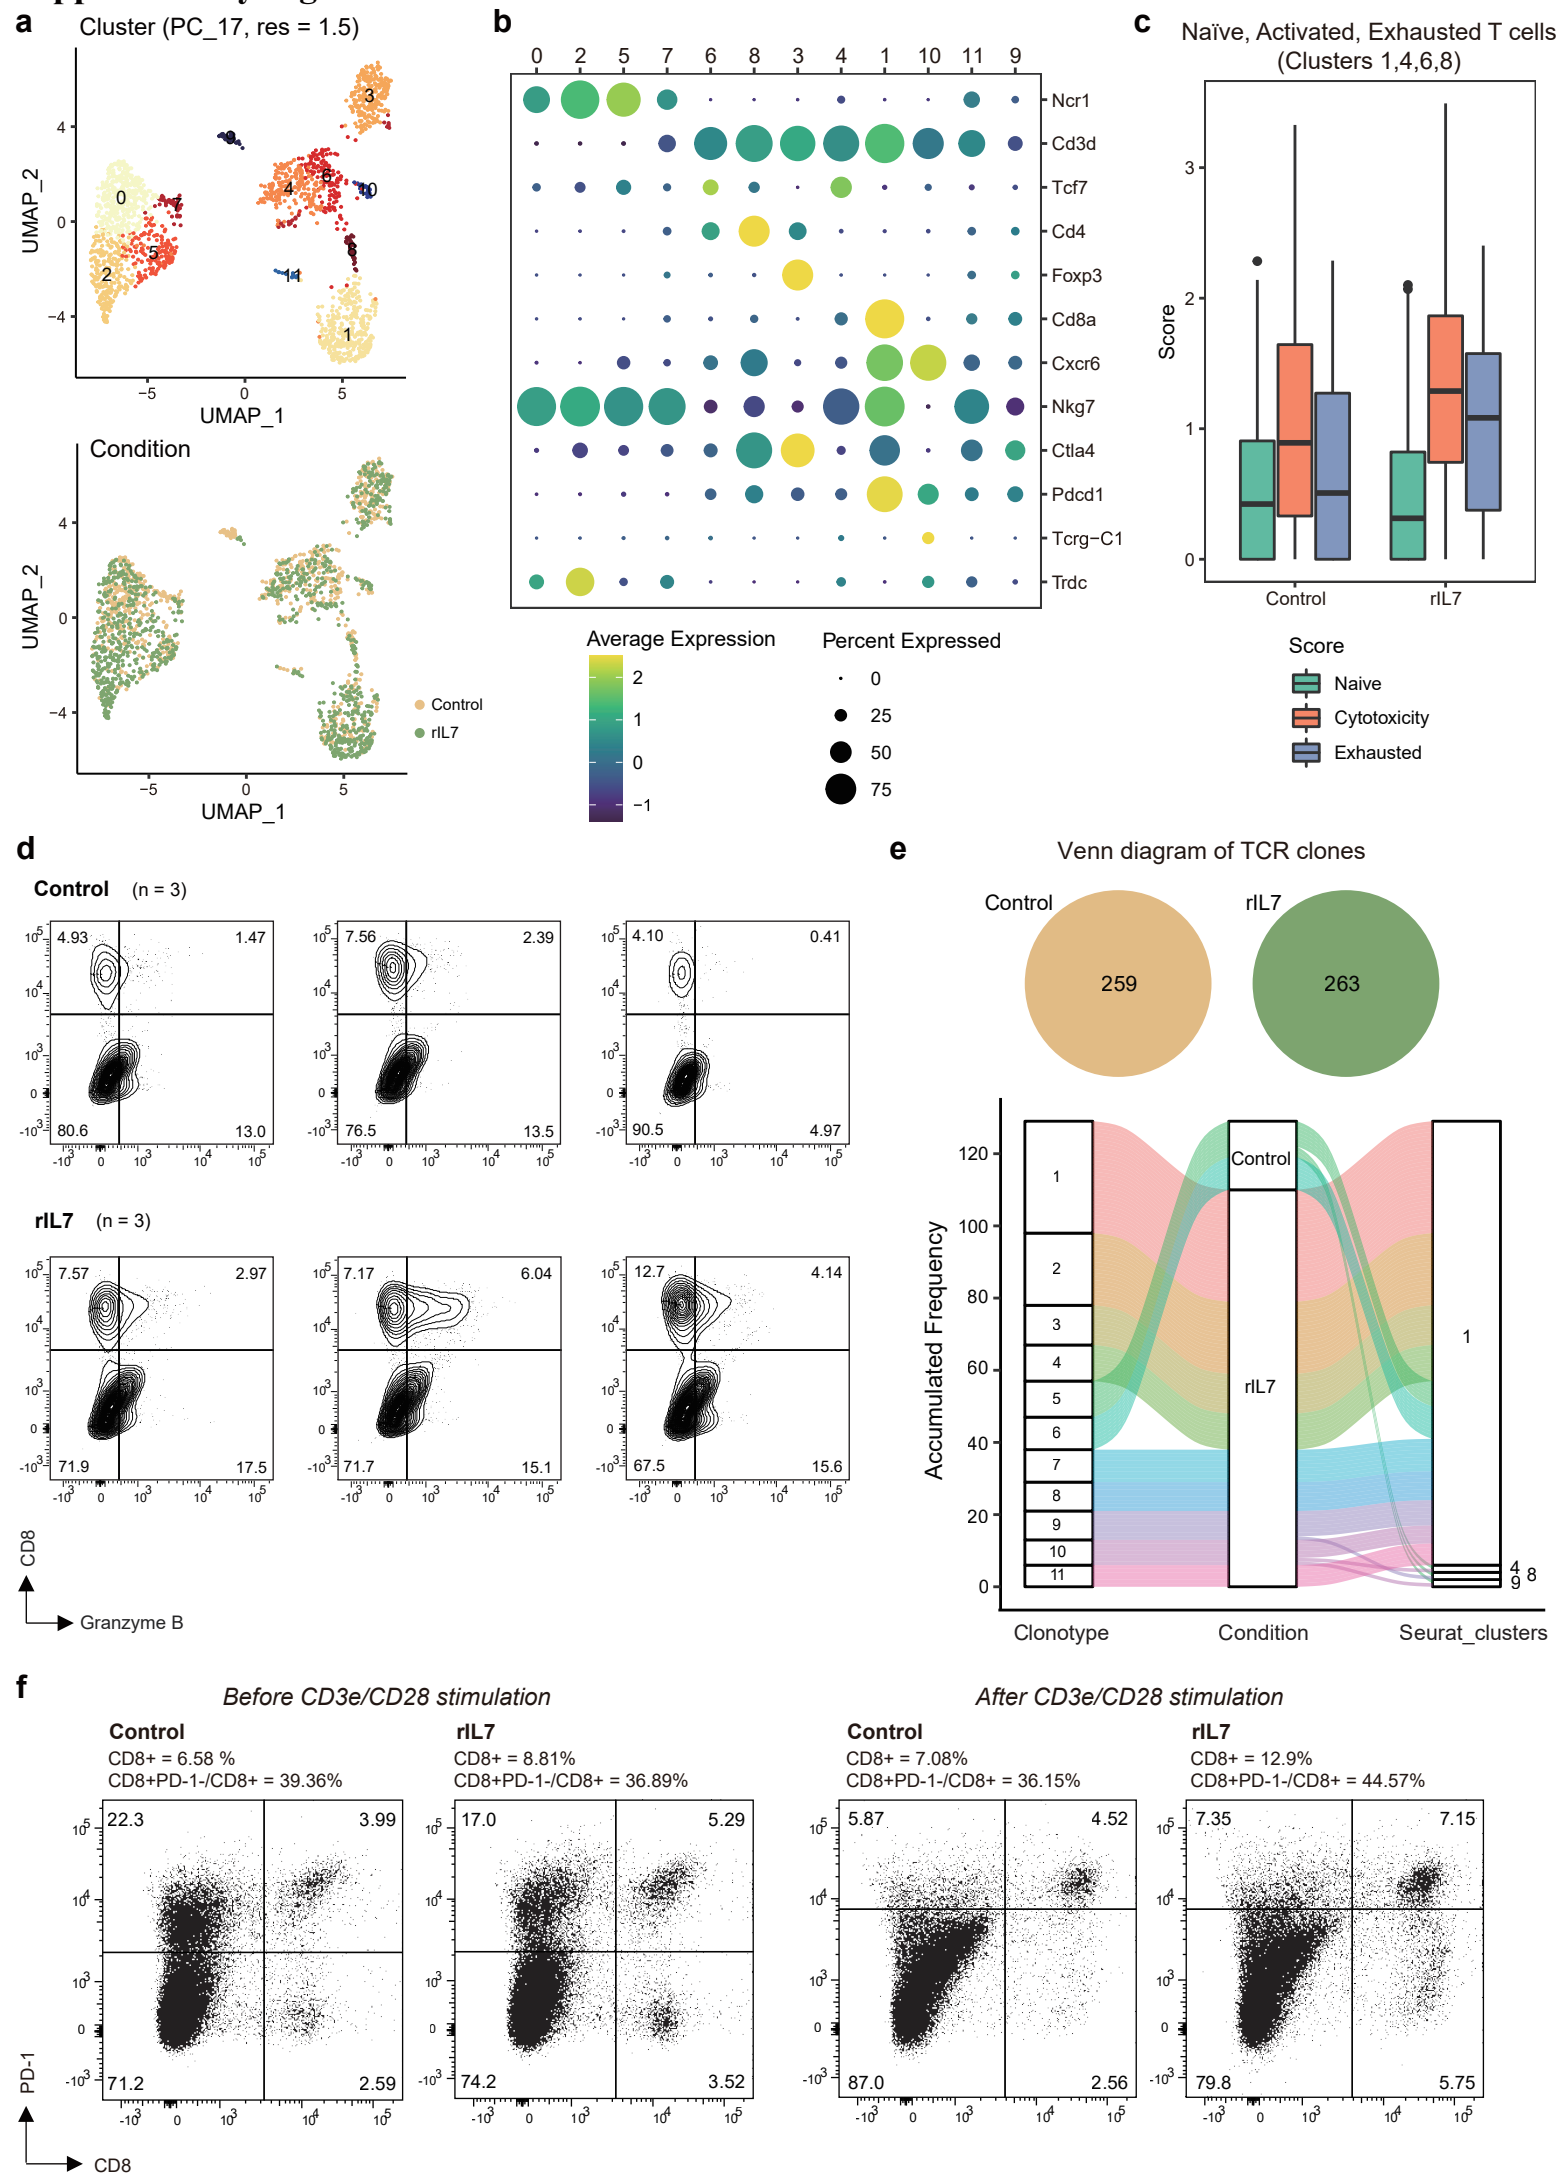

**Supplementary Fig 9. Analysis of T/NK subset using scRNA-seq after rIL7 treatment.** **a**, UMAP plots of T/NK cells, colored by cluster, treatment condition (sample), and subset as indicated. **b**, Dot plot of expression of known cell subset markers in each cluster. Color depicts mean expression value and size depicts the fraction of cells with the gene expression. **c**, Boxplot of T cell functionality scores in each condition. **d**, Flow cytometry analysis of CD8<sup>+</sup> GranzymeB<sup>+</sup> cells in the CD45<sup>+</sup> CD3<sup>+</sup> fraction of individual mouse in relation to Fig. 3g. **e**, Venn diagram (upper) and alluvial plot (lower) indicate that there were no overlapping TCR clones between control and rIL7 groups. Alluvial plot was drawn for clonotypes with more than 5 copies. **f**, Flow cytometry analysis of CD8<sup>+</sup> T cells in rIL7 and control group. For T cell activation, CD45<sup>+</sup> cells were incubated with CD3 $\epsilon$ /CD28 antibodies for 21 h along with brefeldin A for the final 4 h. Numbers within quadrant indicate the percentage of cells.

Supplementary Figure 10

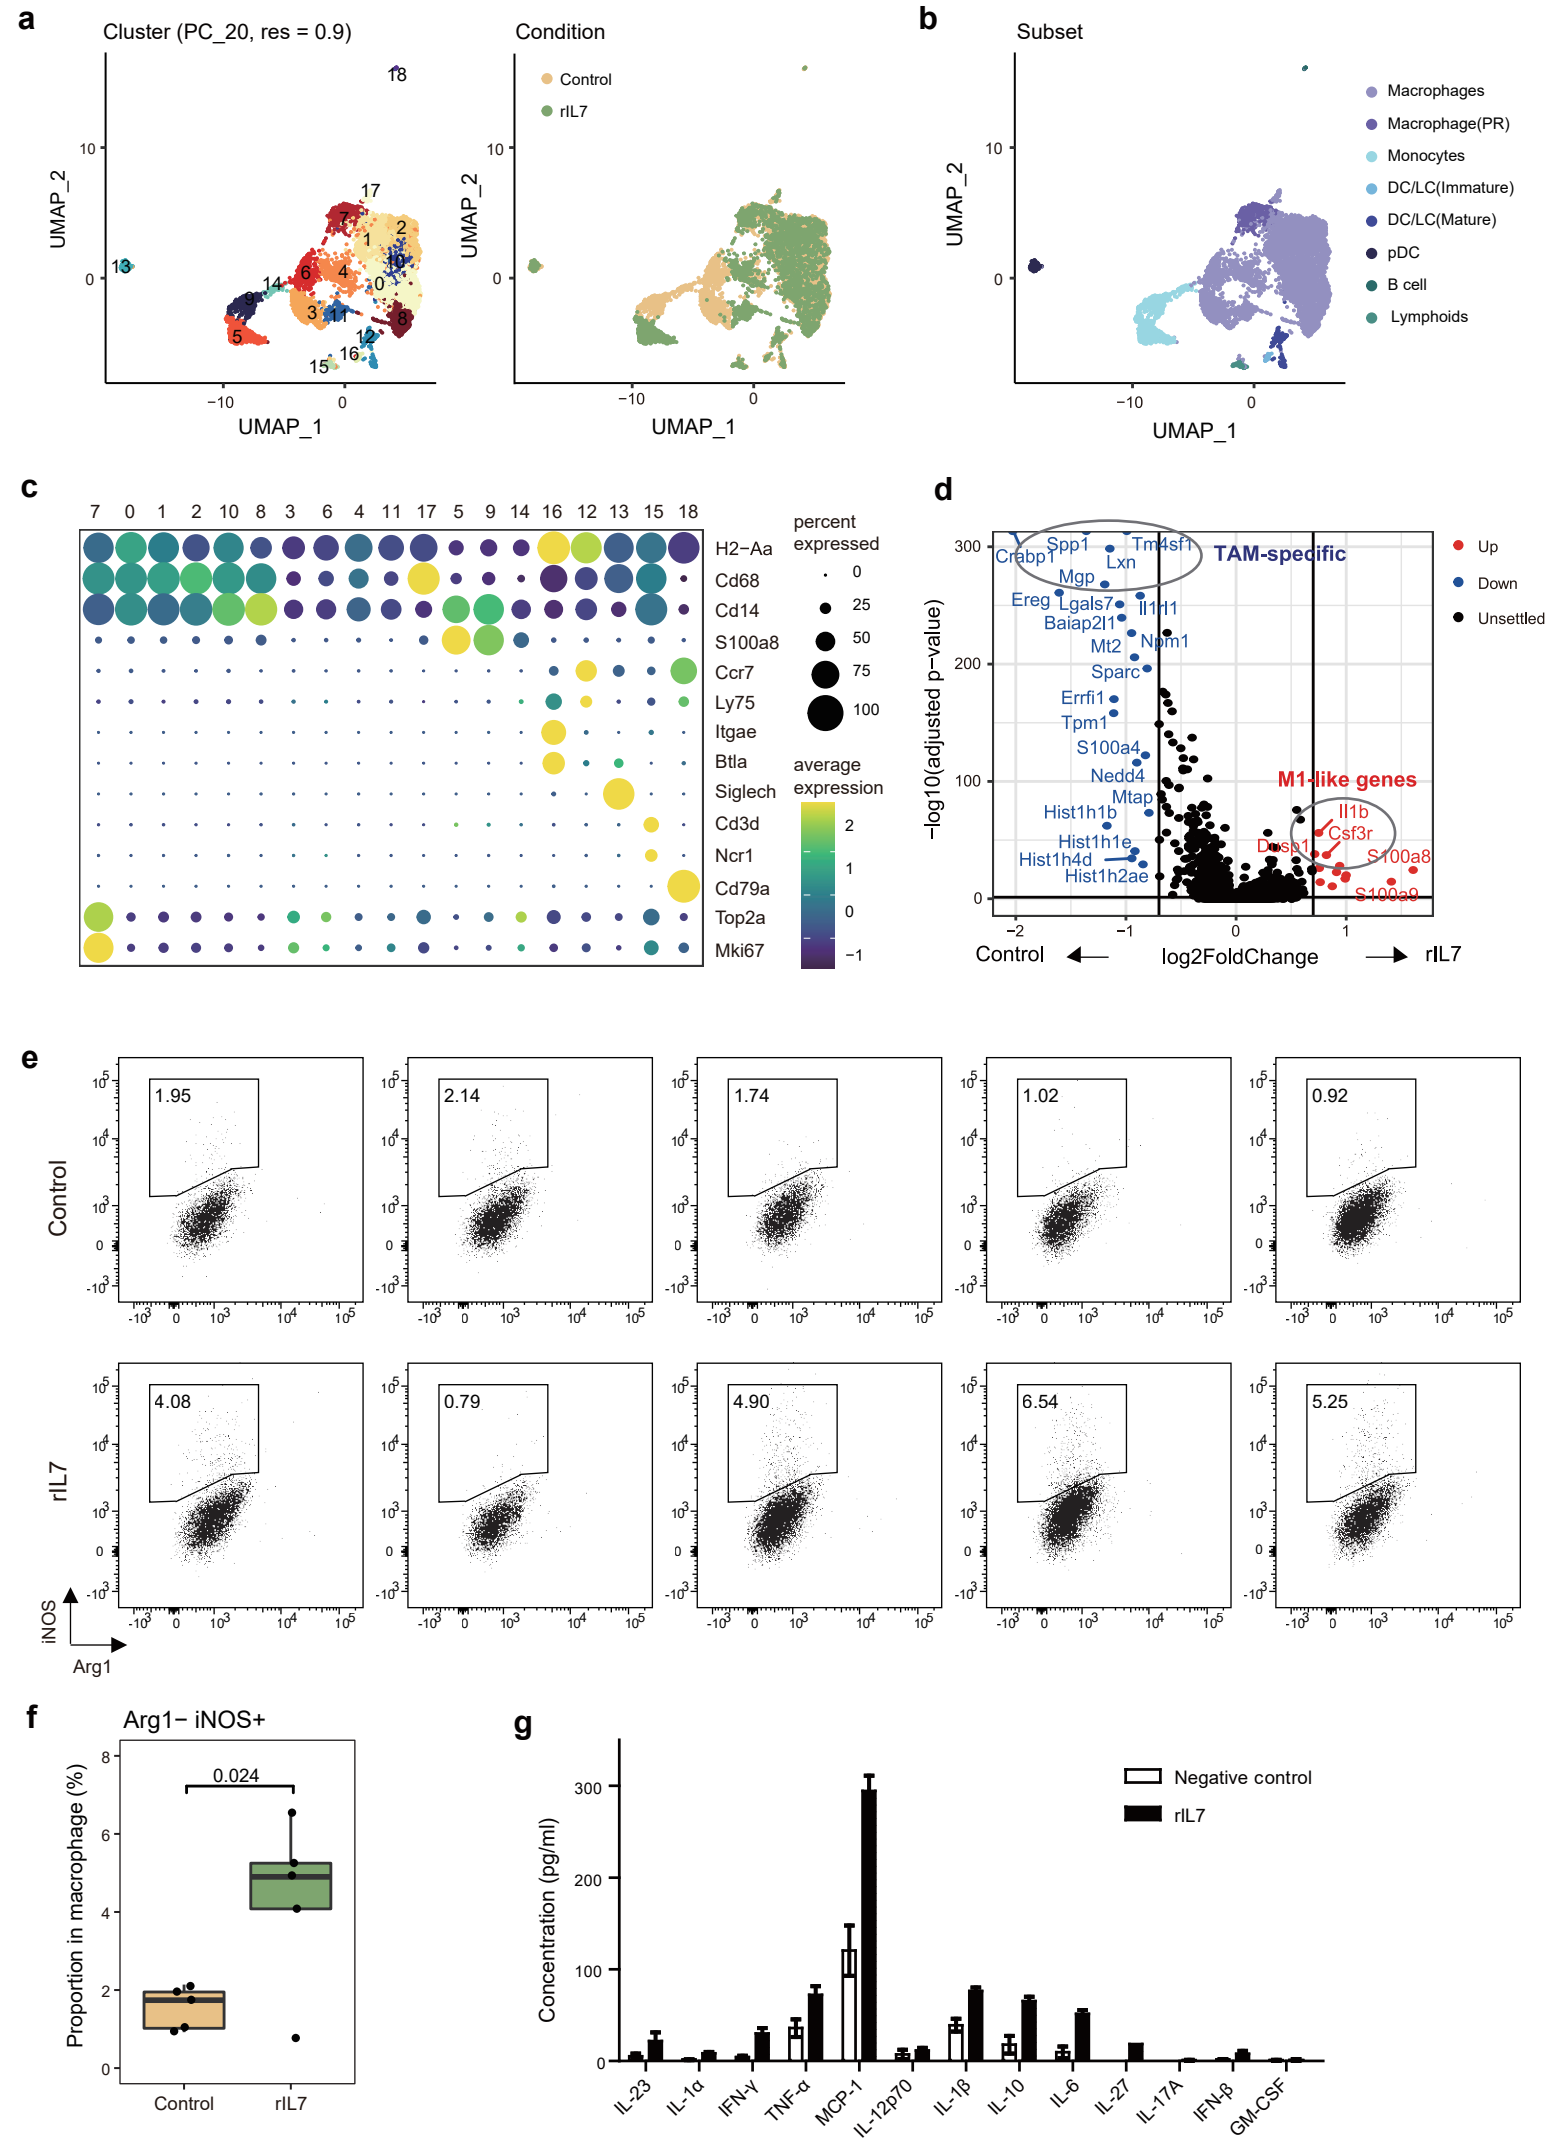

**Supplementary Fig 10. Analysis of myeloid subset using scRNA-seq after rIL7 treatment. a,** UMAP plots of myeloid cells, colored by cluster or condition (sample) as indicated. **b,** UMAP plot with subsets of myeloid cells. **c,** Dot plot of known cell subset markers in each cluster. Color depicts mean expression value and size depicts the fraction of cells with the gene expression. **d,** Volcano plot for differentially expressed genes between macrophages from the control and rIL7 groups. **e and f,** Flow cytometry analysis of Arg-iNOS<sup>+</sup> cells in the CD45<sup>+</sup> F4/80<sup>+</sup> fraction for individual mice (e) and a summary boxplot (f). p-value from the two-sided T-test is indicated. **g,** Cytokine/chemokine levels upon in vitro rIL7 treatment of CD11b<sup>+</sup> cells from tumor tissues (n = 3). Supernatants were analyzed by multi-analyte flow assays of IL-23, IL-a, IFN-g, TNF-a, MCP-1, IL-12p70, IL-1b, IL-10, IL-6, IL-27, IL-17A, IFN-b, and GM-CSF.

### Supplementary Figure 11.

**a**

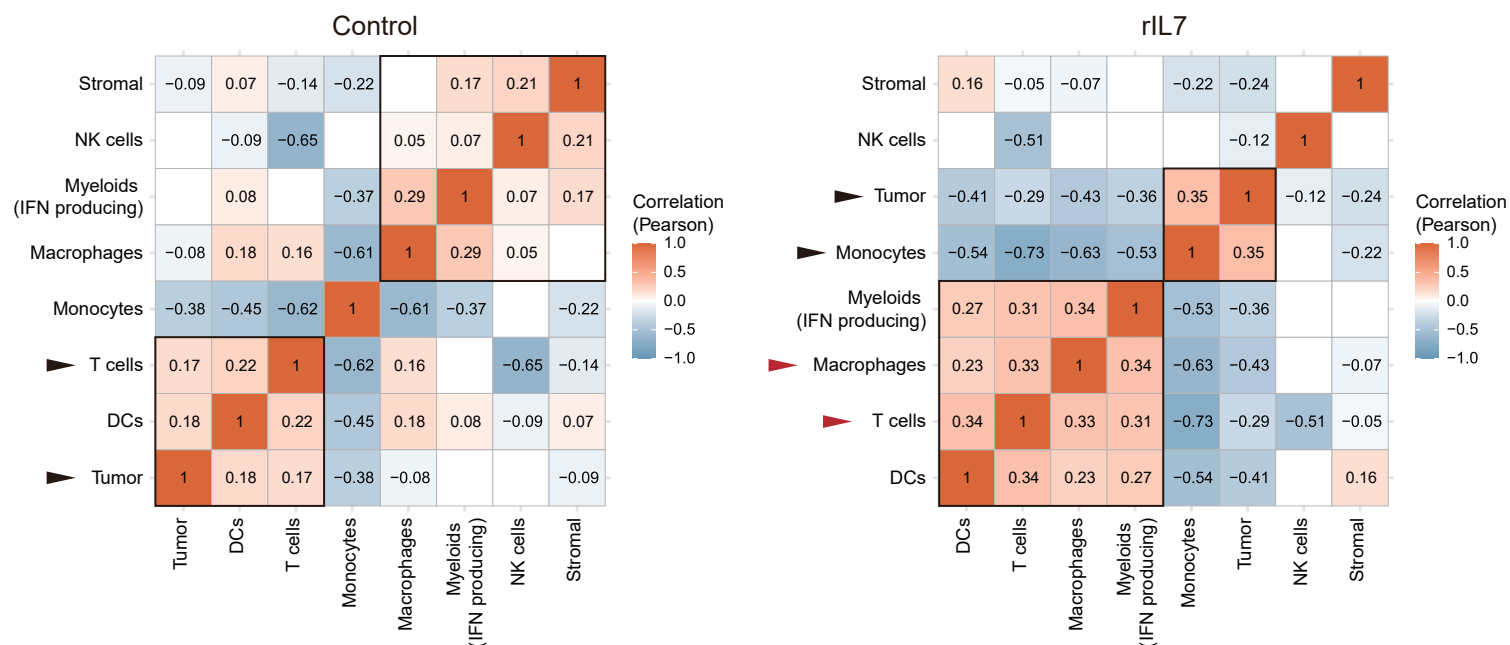

b

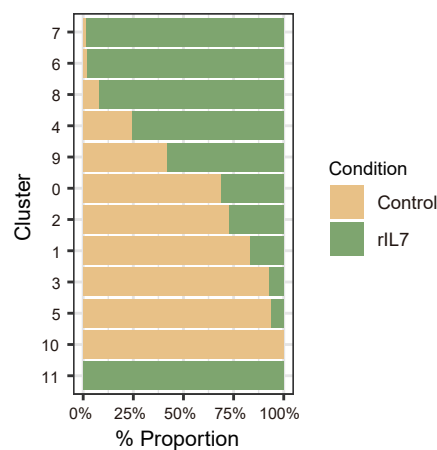

**C**

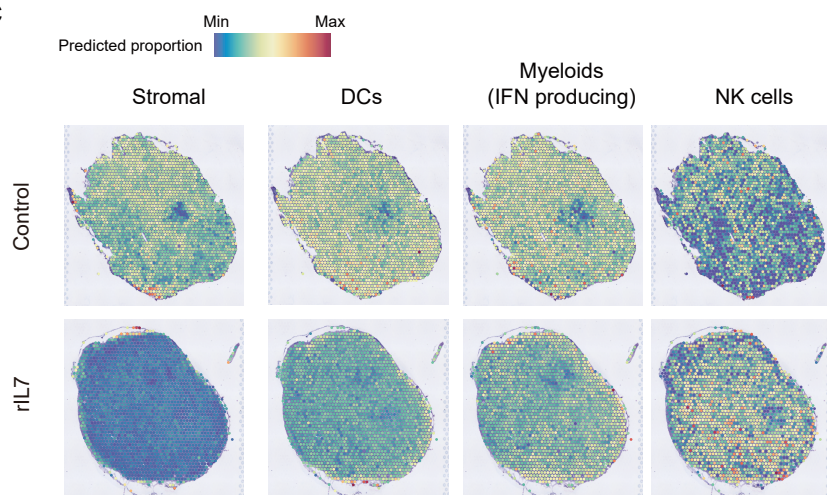

**d**

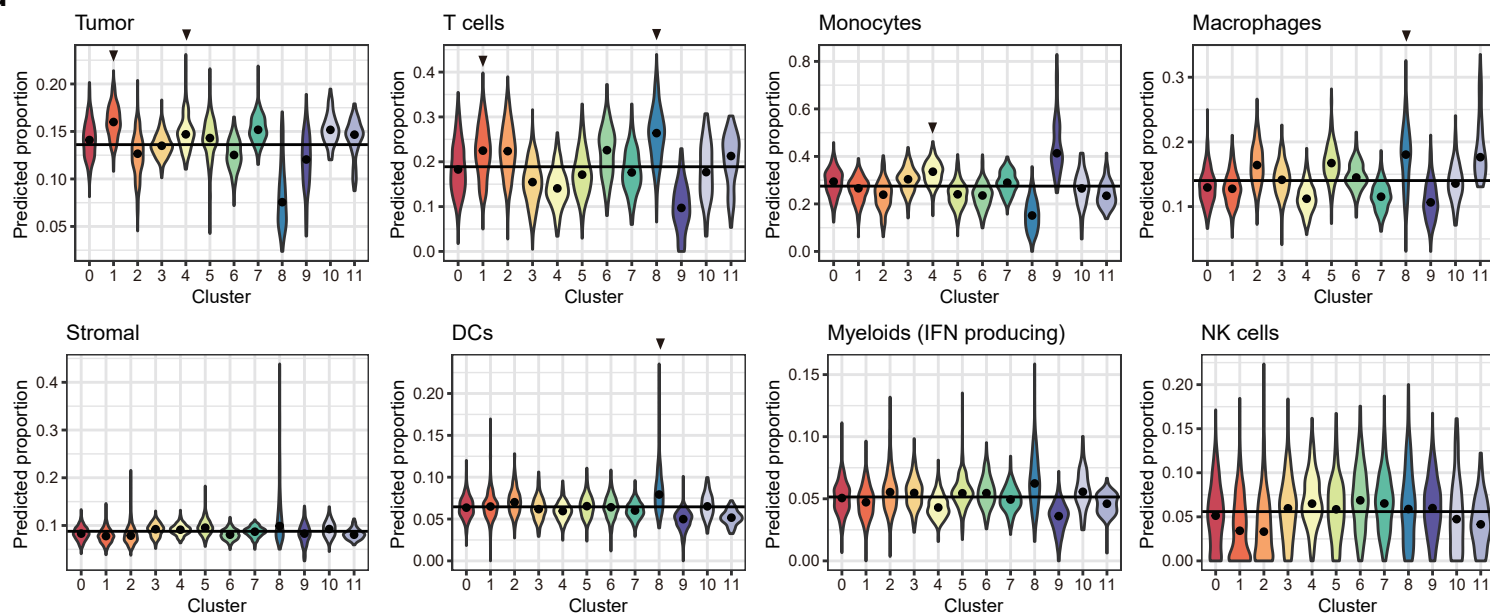

**Supplementary Fig 11. Visium data of mouse tumor model with rIL7 treatment.** **a**, Predicted cell-cell proportion correlation was analyzed by SPOTlight in each sample. Changes in T cell neighborhoods were observed (triangle annotation). **b**, Percentage bar plot of treatment condition in each cluster. **c**, Tissue images overpainted by the predicted proportion of stromal, DCs, IFN producing myeloids, and NK cells relative to Fig. 5f. **d**, Violin plots of expected cell type proportions in each cluster. Black dots and black lines represent medians within clusters and medians across clusters, respectively. Cell types co-localized in C1, C4, and C8 were annotated by triangle.
